# Supplementary material for: Formation and conversion of six temperature-dependent fluorescent ZnII-complexes containing two in situ formed N-rich heterocyclic ligands
Source: Royal Society of Chemistry journal article supplement (doi:10.1039/c6ra25678c), 2017-01-01

## Supporting Information

### Formation and conversion of six temperature-dependent fluorescent Zn<sup>II</sup>-complexes containing two *in situ* formed N-rich heterocyclic ligands

Qin Wei,<sup>a</sup> Mei-Juan Wei,<sup>a</sup> Yan-Jun Ou,<sup>a</sup> Ji-Yuan Zhang,<sup>d</sup> Xia Huang,<sup>a</sup> Yue-Peng Cai,<sup>\*a,b,c</sup> Li-Ping Si<sup>\*a</sup>

<sup>a</sup>School of Chemistry and Environment, South China Normal University;

<sup>b</sup>Guangzhou Key Laboratory of Materials for Energy Conversion and Storage, Guangzhou 510006, P.R. China;

<sup>c</sup>Guangdong Provincial Engineering Technology Research Center for Materials for Energy Conversion and Storage, Guangzhou 510080, P. R. China;

<sup>d</sup>Guangzhou Institute of Energy Conversion, Chinese Academy of Sciences, Guangzhou 510640, P. R. China.

## Contents

- 1. Table S1.** Crystallographic data and structure refinement summary for **1** to **6**.
- 2. Table S2.** Selected bond lengths and angles for compounds **1-6**.
- 3. Table S3.** Hydrogen bond parameters of compounds **1-6**.
- 4. Scheme S1.** Possible *in situ* forming mechanism for  $L^{2-3}$ .
- 5. Figure S1.** Powder X-ray diffraction (PXRD) patterns (Experimental and Simulated) of **1-6**.
- 6. Figure S2.** TGA curves of complexes **1-6**.
- 7. Figure S3.** Visible emission spectra of complexes **1-6** in the solid state at room temperature.
- 8. Figure S4.** UV absorption spectra for interaction between  $Zn^{2+}$  and  $L^{1+2}$ -Pfd in DMF+pyridine.
- 9. Figure S5.** The job plot showing the binding ratio between  $Zn^{2+}$  and ligand ( $L^{1+2}$ -Pfd) (1:1) in DMF+pyridine.
- 10. Figure S6.** Fluorescence emission spectra of  $L^{1+2}$ -Pfd upon addition of  $ZnCl_2$  in DMF+pyridine.  $\lambda_{ex} = 355$  nm at  $100^\circ C$  ( $[L^{1+2}\text{-Pfd}] = 0.10$  mM;  $[Zn^{2+}] = 0, 0.01, 0.02, 0.03, 0.04, 0.05, 0.06, 0.07, 0.08, 0.09, 0.10, 0.11, 0.12, 0.13, 0.131, 0.132, 0.133, 0.14, 0.15, 0.16, 0.17, 0.18, 0.19, 0.20$  mM).
- 11. Figure S7.** Fluorescence emission spectra of  $L^{1+2}$ -Pfd upon addition of  $ZnCl_2$  in DMF+pyridine.  $\lambda_{ex} = 355$  nm at  $120^\circ C$  ( $[L^{1+2}\text{-Pfd}] = 0.10$  mM;  $[Zn^{2+}] = 0, 0.01, 0.02, 0.03, 0.04, 0.05, 0.06, 0.07, 0.08, 0.09, 0.10, 0.11, 0.12, 0.13, 0.131, 0.132, 0.133, 0.14, 0.15, 0.16, 0.17, 0.18, 0.19, 0.20$  mM).
- 12. Figure S8.** Fluorescence emission spectra of **3** upon addition of  $NaN_3$  in DMF+pyridine.  $\lambda_{ex} = 355$  nm at  $80^\circ C$  ( $[3] = 0.10$  mM;  $[N_3^-] = 0, 0.01, 0.02, 0.03, 0.04, 0.05, 0.06, 0.07, 0.08, 0.09, 0.10, 0.11, 0.12, 0.13, 0.131, 0.132, 0.133, 0.14, 0.15, 0.16, 0.17, 0.18, 0.19, 0.20$  mM).
- 13. Figure S9.** Fluorescence emission spectra of **4** upon addition of  $NaN_3$  in DMF+pyridine.  $\lambda_{ex} = 355$  nm at  $80^\circ C$  ( $[4] = 0.10$  mM;  $[N_3^-] = 0, 0.01, 0.02, 0.03, 0.04, 0.05, 0.06, 0.07, 0.08, 0.09, 0.10, 0.11, 0.12, 0.13, 0.131, 0.132, 0.133, 0.14, 0.15, 0.16, 0.17, 0.18, 0.19, 0.20$  mM).

**Table S1.** Crystallographic data and structure refinement summary for **1** to **3**.

| <b>Complex</b>                                                  | <b>1</b>                                                          | <b>2</b>                                           | <b>3</b>                                                                        |
|-----------------------------------------------------------------|-------------------------------------------------------------------|----------------------------------------------------|---------------------------------------------------------------------------------|
| Empirical formula                                               | C <sub>18</sub> H <sub>14</sub> Cl <sub>2</sub> N <sub>4</sub> Zn | C <sub>18</sub> H <sub>14</sub> N <sub>10</sub> Zn | C <sub>36</sub> H <sub>28</sub> Cl <sub>4</sub> N <sub>8</sub> OZn <sub>2</sub> |
| Formula weight                                                  | 422.60                                                            | 435.76                                             | 1246.63                                                                         |
| Crystal system                                                  | monoclinic                                                        | monoclinic                                         | monoclinic                                                                      |
| Space group                                                     | <i>P2<sub>1</sub>/n</i>                                           | <i>C2/c</i>                                        | <i>P2<sub>1</sub>/c</i>                                                         |
| <i>a</i> (Å)                                                    | 7.229(3)                                                          | 18.130(3)                                          | 15.388(6)                                                                       |
| <i>b</i> (Å)                                                    | 14.023(6)                                                         | 18.615(3)                                          | 12.271(5)                                                                       |
| <i>c</i> (Å)                                                    | 19.027(7)                                                         | 13.827(2)                                          | 19.046(6)                                                                       |
| $\alpha$ (°)                                                    | 90                                                                | 90                                                 | 90                                                                              |
| $\beta$ (°)                                                     | 95.403(5)                                                         | 128.341(2)                                         | 122.12(2)                                                                       |
| $\gamma$ (°)                                                    | 90                                                                | 90                                                 | 90                                                                              |
| <i>V</i> (Å <sup>3</sup> )                                      | 1920.3(13)                                                        | 3660.1(10)                                         | 3046.0(2)                                                                       |
| <i>Z</i>                                                        | 4                                                                 | 8                                                  | 2                                                                               |
| $\rho$ (cald.) (mg m <sup>-3</sup> )                            | 1.462                                                             | 1.582                                              | 1.359                                                                           |
| <i>T</i> (K)                                                    | 298(2)                                                            | 293(2)                                             | 298(2)                                                                          |
| $\mu$ (mm <sup>-1</sup> )                                       | 1.564                                                             | 1.371                                              | 0.688                                                                           |
| <i>R</i> <sub>int</sub>                                         | 0.0355                                                            | 0.0395                                             | 0.0543                                                                          |
| GOF                                                             | 1.027                                                             | 1.021                                              | 1.040                                                                           |
| <i>R</i> <sub>1</sub> [ <i>I</i> > 2σ( <i>I</i> )] <sup>a</sup> | 0.0320                                                            | 0.0455                                             | 0.0491                                                                          |
| <i>wR</i> <sub>2</sub> (all data) <sup>b</sup>                  | 0.0748                                                            | 0.1137                                             | 0.1328                                                                          |

<sup>a</sup>  $R_1 = \sum ||F_o| - |F_c|| / \sum |F_o|$ . <sup>b</sup>  $wR_2 = \{ \sum [w(F_o^2 - F_c^2)^2] / \sum (F_o^2)^2 \}^{1/2}$ , where  $w = 1 / (\sigma^2(F_o^2) + (aP)^2 + bP)$ ,  $P = (F_o^2 + 2F_c^2) / 3$

(to be continued) **Table S1.** Crystallographic data and structure refinement summary for **4** to **6**.

| <b>Complex</b>                                                  | <b>4</b>                                                                       | <b>5</b>                                                        | <b>6</b>                                                        |
|-----------------------------------------------------------------|--------------------------------------------------------------------------------|-----------------------------------------------------------------|-----------------------------------------------------------------|
| Empirical formula                                               | C <sub>36</sub> H <sub>26</sub> Cl <sub>4</sub> N <sub>8</sub> Zn <sub>2</sub> | C <sub>36</sub> H <sub>26</sub> N <sub>2</sub> OZn <sub>2</sub> | C <sub>36</sub> H <sub>26</sub> N <sub>20</sub> Zn <sub>2</sub> |
| Formula weight                                                  | 843.19                                                                         | 869.51                                                          | 869.51                                                          |
| Crystal system                                                  | monoclinic                                                                     | monoclinic                                                      | triclinic                                                       |
| Space group                                                     | <i>P2<sub>1</sub>/c</i>                                                        | <i>P2<sub>1</sub>/n</i>                                         | <i>P-1</i>                                                      |
| <i>a</i> (Å)                                                    | 8.730(2)                                                                       | 8.884(2)                                                        | 8.0218(8)                                                       |
| <i>b</i> (Å)                                                    | 13.047(4)                                                                      | 19.730(5)                                                       | 10.0798(10)                                                     |
| <i>c</i> (Å)                                                    | 15.560(4)                                                                      | 21.404(6)                                                       | 11.6154(12)                                                     |
| $\alpha$ (°)                                                    | 90                                                                             | 90                                                              | 83.9840(10)                                                     |
| $\beta$ (°)                                                     | 96.344(3)                                                                      | 93.623(4)                                                       | 83.1740(10)                                                     |
| $\gamma$ (°)                                                    | 90                                                                             | 90                                                              | 76.6970(10)                                                     |
| <i>V</i> (Å <sup>3</sup> )                                      | 1761.5(8)                                                                      | 3744.1(18)                                                      | 904.60(16)                                                      |
| <i>Z</i>                                                        | 2                                                                              | 4                                                               | 1                                                               |
| $\rho$ (cald.) (mg m <sup>-3</sup> )                            | 1.590                                                                          | 1.543                                                           | 1.596                                                           |
| <i>T</i> (K)                                                    | 296(2)                                                                         | 296(2)                                                          | 296(2)                                                          |
| $\mu$ (mm <sup>-1</sup> )                                       | 1.705                                                                          | 1.340                                                           | 1.386                                                           |
| <i>R</i> <sub>int</sub>                                         | 0.0298                                                                         | 0.0672                                                          | 0.0168                                                          |
| GOF                                                             | 1.052                                                                          | 1.050                                                           | 1.032                                                           |
| <i>R</i> <sub>1</sub> [ <i>I</i> > 2σ( <i>I</i> )] <sup>a</sup> | 0.0395                                                                         | 0.0600                                                          | 0.0483                                                          |
| <i>wR</i> <sub>2</sub> (all data) <sup>b</sup>                  | 0.1007                                                                         | 0.1514                                                          | 0.1387                                                          |

<sup>a</sup>  $R_1 = \sum ||F_o| - |F_c|| / \sum |F_o|$ . <sup>b</sup>  $wR_2 = \{ \sum [w(F_o^2 - F_c^2)^2] / \sum (F_o^2)^2 \}^{1/2}$ , where  $w = 1 / (\sigma^2(F_o^2) + (aP)^2 + bP)$ ,  $P = (F_o^2 + 2F_c^2) / 3$

**Table S2.** Selected bond lengths (Å) and bond angles (°) for compounds **1-6**.

| <b>1</b>          |            |                   |            |
|-------------------|------------|-------------------|------------|
| N(2)-Zn(1)-Cl(2)  | 102.98(10) | Cl(1)-Zn(1)-N(3)  | 89.91(10)  |
| N(2)-Zn(1)-Cl(1)  | 148.81(10) | N(1)-Zn(1)-N(3)   | 139.66(13) |
| Cl(2)-Zn(1)-Cl(1) | 106.89(6)  | Zn(1)-N(2)        | 2.030(4)   |
| N(2)-Zn(1)-N(1)   | 83.55(14)  | Zn(1)-Cl(2)       | 2.2602(14) |
| Cl(2)-Zn(1)-N(1)  | 107.21(10) | Zn(1)-Cl(1)       | 2.2626(16) |
| Cl(1)-Zn(1)-N(1)  | 95.87(11)  | Zn(1)-N(1)        | 2.275(3)   |
| N(1)-Zn(2)-N(3)   | 71.82(14)  | Zn(1)-N(3)        | 2.385(4)   |
| Cl(2)-Zn(1)-N(3)  | 109.13(9)  |                   |            |
| <b>2</b>          |            |                   |            |
| N(8)-Zn(1)-N(5)   | 113.4(2)   | N(2)-Zn(1)-N(4)   | 74.61(12)  |
| N(8)-Zn(1)-N(2)   | 128.08(18) | N(1)-Zn(1)-N(4)   | 160.18(12) |
| N(5)-Zn(1)-N(2)   | 118.04(15) | Zn(1)-N(8)        | 1.950(4)   |
| N(8)-Zn(1)-N(1)   | 96.03(16)  | Zn(1)-N(5)        | 2.007(5)   |
| N(5)-Zn(1)-N(1)   | 95.31(15)  | Zn(1)-N(2)        | 2.026(3)   |
| N(2)-Zn(1)-N(1)   | 86.39(12)  | Zn(1)-N(1)        | 2.212(3)   |
| N(8)-Zn(1)-N(4)   | 100.08(15) | Zn(1)-N(4)        | 2.283(3)   |
| N(5)-Zn(1)-N(4)   | 88.86(15)  |                   |            |
| <b>3</b>          |            |                   |            |
| N(2)-Zn(1)-Cl(1)  | 118.98(18) | Cl(1)-Zn(1)-Cl(2) | 118.66(13) |
| N(2)-Zn(1)-N(1)   | 85.2(3)    | N(1)-Zn(1)-Cl(2)  | 93.44(18)  |
| Cl(1)-Zn(1)-N(1)  | 97.40(18)  | N(2)-Zn(1)-N(4)   | 73.5(3)    |
| N(2)-Zn(1)-Cl(2)  | 122.01(17) | Zn(1)-N(2)        | 2.027(6)   |
| Cl(1)-Zn(1)-N(4)  | 99.2(2)    | Zn(1)-Cl(1)       | 2.219(3)   |
| N(1)-Zn(1)-N(4)   | 157.5(3)   | Zn(1)-N(1)        | 2.279(6)   |
| Cl(2)-Zn(1)-N(4)  | 91.87(18)  | Zn(1)-Cl(2)       | 2.279(4)   |
| <b>4</b>          |            |                   |            |
| N(2)-Zn(1)-Cl(2)  | 117.00(13) | Cl(1)-Zn(1)-N(3)  | 90.13(13)  |
| N(2)-Zn(1)-Cl(1)  | 121.41(12) | N(1)-Zn(1)-N(3)   | 155.69(19) |
| Cl(2)-Zn(1)-Cl(1) | 121.29(7)  | Zn(1)-N(2)        | 2.019(4)   |
| N(2)-Zn(1)-N(1)   | 83.99(17)  | Zn(1)-Cl(2)       | 2.2359(17) |
| Cl(2)-Zn(1)-N(1)  | 98.33(11)  | Zn(1)-Cl(1)       | 2.2570(16) |
| Cl(1)-Zn(1)-N(1)  | 93.05(11)  | Zn(1)-N(1)        | 2.308(4)   |
| N(2)-Zn(1)-N(3)   | 73.9(2)    | Zn(1)-N(3)        | 2.308(5)   |

|                   |            |                   |            |
|-------------------|------------|-------------------|------------|
| Cl(2)-Zn(1)-N(3)  | 100.55(14) |                   |            |
| <b>5</b>          |            |                   |            |
| N(4)-Zn(1)-N(5)   | 113.1(2)   | Zn(1)-N(4)        | 1.954(5)   |
| N(4)-Zn(1)-N(2)   | 136.3(2)   | Zn(1)-N(5)        | 1.972(6)   |
| N(5)-Zn(1)-N(2)   | 110.3(2)   | Zn(1)-N(2)        | 2.029(4)   |
| N(4)-Zn(1)-N(3)   | 92.5(2)    | Zn(1)-N(3)        | 2.268(5)   |
| N(5)-Zn(1)-N(3)   | 100.4(2)   | Zn(1)-N(1)        | 2.342(5)   |
| N(2)-Zn(1)-N(3)   | 84.50(18)  | Zn(2)-N(14)       | 1.994(6)   |
| N(4)-Zn(1)-N(1)   | 94.4(2)    | Zn(2)-N(15)       | 2.000(6)   |
| N(5)-Zn(1)-N(1)   | 99.6(2)    | Zn(2)-N(12)       | 2.038(5)   |
| N(2)-Zn(1)-N(1)   | 73.42(17)  | Zn(2)-N(13)       | 2.284(5)   |
| N(3)-Zn(1)-N(1)   | 154.26(18) | Zn(2)-N(11)       | 2.282(5)   |
| N(14)-Zn(2)-N(15) | 109.0(3)   | N(12)-Zn(2)-N(13) | 83.58(18)  |
| N(14)-Zn(2)-N(12) | 103.9(2)   | N(14)-Zn(2)-N(11) | 106.6(2)   |
| N(15)-Zn(2)-N(12) | 146.2(2)   | N(15)-Zn(2)-N(11) | 89.6(2)    |
| N(14)-Zn(2)-N(13) | 101.7(2)   | N(12)-Zn(2)-N(11) | 73.43(19)  |
| N(15)-Zn(2)-N(13) | 97.1(2)    | N(13)-Zn(2)-N(11) | 146.93(19) |
| <b>6</b>          |            |                   |            |
| N(10)-Zn(1)-N(2)  | 130.94(16) | N(9)-Zn(1)-N(1)   | 98.38(15)  |
| N(10)-Zn(1)-N(9)  | 113.91(18) | N(3)-Zn(1)-N(1)   | 155.43(14) |
| N(2)-Zn(1)-N(9)   | 113.42(16) | Zn(1)-N(2)        | 2.029(3)   |
| N(10)-Zn(1)-N(3)  | 96.21(14)  | Zn(1)-N(3)        | 2.216(3)   |
| N(2)-Zn(1)-N(3)   | 86.71(12)  | Zn(1)-N(10)       | 1.979(4)   |
| N(9)-Zn(1)-N(3)   | 101.25(14) | Zn(1)-N(9)        | 1.988(4)   |
| N(10)-Zn(1)-N(1)  | 89.15(15)  | Zn(1)-N(1)        | 2.388(3)   |
| N(2)-Zn(1)-N(1)   | 71.93(13)  |                   |            |

**Table S3.** Hydrogen bond parameters of compounds **1-6**.

| D-H...A                                                 | d (D-H) (Å) | d (H...A) (Å) | d (D...A) (Å) | ∠ DHA (°) |
|---------------------------------------------------------|-------------|---------------|---------------|-----------|
| <b>1</b>                                                |             |               |               |           |
| C1-H1...Cl <sub>1</sub>                                 | 0.93        | 2.64          | 3.310         | 129.7     |
| C <sub>12</sub> -H <sub>12</sub> ...Cl <sub>2</sub> #1  | 0.93        | 2.87          | 3.681         | 146.2     |
| C <sub>15</sub> -H <sub>15</sub> ...Cl <sub>2</sub> #1  | 0.93        | 2.86          | 3.700         | 150.8     |
| C <sub>9</sub> -H <sub>9</sub> ...Cl <sub>2</sub> #2    | 0.93        | 2.89          | 3.721         | 149.3     |
| π <sup>a</sup> ...π <sup>b</sup>                        |             |               | 3.760         |           |
| <b>2</b>                                                |             |               |               |           |
| C <sub>6</sub> -H <sub>6A</sub> ...N <sub>7</sub> #7    | 0.97        | 2.61          | 3.461         | 145.8     |
| C <sub>6</sub> -H <sub>6B</sub> ...N <sub>10</sub> #8   | 0.97        | 2.54          | 3.504         | 171.8     |
| C <sub>12</sub> -H <sub>12</sub> ...N <sub>6</sub> #9   | 0.92        | 2.58          | 3.415         | 148.5     |
| C <sub>16</sub> -H <sub>16</sub> ...N <sub>5</sub> #10  | 0.93        | 2.73          | 3.617         | 158.9     |
| C <sub>17</sub> -H <sub>17</sub> ...N <sub>7</sub> #11  | 0.93        | 2.70          | 3.386         | 131.0     |
| π <sup>a</sup> ...π <sup>b</sup>                        |             |               | 3.752         |           |
| <b>3</b>                                                |             |               |               |           |
| C <sub>12</sub> -H <sub>12</sub> ...Cl <sub>2</sub> #12 | 0.93        | 2.76          | 3.588         | 147.6     |
| C <sub>12</sub> -H <sub>12</sub> ...Cl <sub>2</sub> #13 | 0.93        | 2.76          | 3.588         | 147.6     |
| π <sup>a</sup> ...π <sup>b</sup>                        |             |               | 3.873         |           |
| <b>4</b>                                                |             |               |               |           |
| C <sub>10</sub> -H <sub>10</sub> ...Cl <sub>1</sub> #14 | 0.93        | 2.84          | 3.662         | 147.2     |
| C <sub>10</sub> -H <sub>10</sub> ...Cl <sub>1</sub> #15 | 0.93        | 2.84          | 3.662         | 147.2     |
| C <sub>18</sub> -H <sub>18</sub> ...Cl <sub>2</sub> #5  | 0.93        | 2.93          | 3.779         | 152.2     |
| C <sub>18</sub> -H <sub>18</sub> ...Cl <sub>2</sub> #16 | 0.93        | 2.93          | 3.779         | 152.2     |
| C <sub>3</sub> -H <sub>3</sub> ...Cl <sub>1</sub> #17   | 0.93        | 2.93          | 3.550         | 124.7     |
| C <sub>3</sub> -H <sub>3</sub> ...Cl <sub>1</sub> #18   | 0.93        | 2.93          | 3.550         | 124.7     |
| <b>5</b>                                                |             |               |               |           |
| C <sub>2</sub> -H <sub>2</sub> ...N <sub>6</sub> #19    | 0.93        | 2.728         | 3.403         | 130.2     |
| C <sub>8</sub> -H <sub>8</sub> ...N <sub>17</sub> #20   | 0.93        | 2.554         | 3.373         | 147.1     |
| C <sub>10</sub> -H <sub>10</sub> ...N <sub>10</sub> #21 | 0.93        | 2.660         | 3.524         | 154.7     |
| C <sub>25</sub> -H <sub>25</sub> ...N <sub>20</sub> #22 | 0.93        | 2.395         | 3.200         | 144.7     |
| C <sub>34</sub> -H <sub>34</sub> ...N <sub>5</sub> #23  | 0.93        | 2.720         | 3.452         | 136.2     |
| <b>6</b>                                                |             |               |               |           |
| C <sub>2</sub> -H <sub>2</sub> ...N <sub>10</sub> #24   | 0.93        | 2.520         | 3.312         | 143.2     |
| C <sub>2</sub> -H <sub>2</sub> ...N <sub>10</sub> #25   | 0.93        | 2.520         | 3.312         | 143.2     |
| C <sub>3</sub> -H <sub>3</sub> ...N <sub>7</sub> #26    | 0.93        | 2.370         | 3.152         | 141.5     |
| C <sub>3</sub> -H <sub>3</sub> ...N <sub>7</sub> #27    | 0.93        | 2.370         | 3.152         | 141.5     |
| C <sub>10</sub> -H <sub>10</sub> ...N <sub>7</sub> #28  | 0.93        | 2.706         | 3.596         | 160.4     |
| C <sub>10</sub> -H <sub>10</sub> ...N <sub>7</sub> #29  | 0.93        | 2.706         | 3.596         | 160.4     |
| π <sup>a</sup> ...π <sup>b</sup>                        |             |               | 3.921         |           |

\*Symmetry transformations used to generate equivalent atoms: #1 1-x, 2-y, 2-z; #2 0.5-x, 0.5+y, 1.5-z; #3 2-x, 0.5+y, 1.5-z; #4 2-x, 2-y, 2-z; #5 2-x, 1-y, 2-z; #6 2-x, -0.5+y, 1.5-z; #7 x, -y, 0.5+z, #8 0.5-x, -0.5+y, 0.5-z, #9 1-x, y, 0.5-z, #10

0.5+x, 0.5-y, 0.5+z, #11 0.5-x, 0.5-y, -z, #12 0.5+x, 0.5-y, 0.5+z, #13 1.5-x, 0.5-y, -z, #14 1+x, y, z, #15 1-x, -y, 2-z, #16 x, -1+y, z, #17 2-x, -0.5+y, 1.5-z, #18 x, 0.5-y, 0.5+z, #19 1+x, 1.5-y, 0.5+z, #20 1-x, 0.5+y, 0.5-z, #21 -1+x, 1.5-y, -0.5+z, #22 -x, 0.5+y, 0.5-z, #23 2-x, 1-y, 1-z, #24 1-x, 1-y, 1-z, #25 1+x, -1+y, -1+z, #26 1-x, -y, 1-z, #27 1+x, y, -1+z, #28 1+x, -1+y, z, #29 1-x, 1-y, -z.

$\pi^a \cdots \pi^b$  shows the distance between centroids of pyridyl/imidazol ring and pyridyl/imidazol ring.



**Scheme S1.**

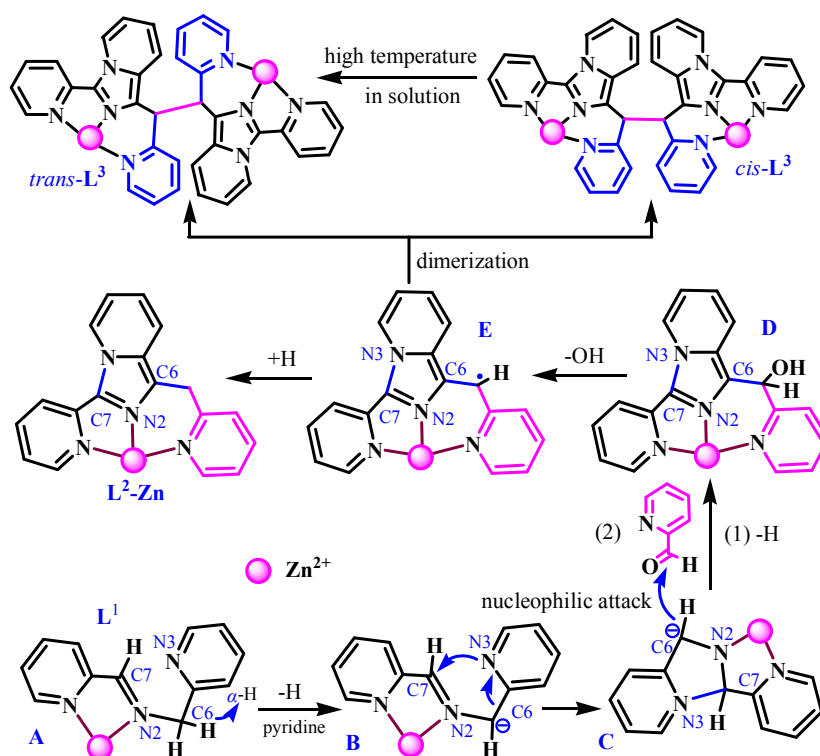

For ligands  $L^{2-3}$ , the possible formation mechanism is outlined in Scheme **S1**. Initially, the carbanion formed at C6 atom from the intermediate **B** increases the nucleophilicity at the heterocyclic nitrogen atom N3, which facilitates a nucleophilic attack at the imino carbon C7 to form C-N bond, resulting in the formation of intermediate **C**. And then coordination of the nitrogen atom of picolinaldehyde to  $Cd^{2+}$  enhances the electrophilicity of the carbon atom of the aldehyde, triggering the formation of an alcoholic intermediate **D** via the nucleophilic attack of **C** to the carbonyl electrophile. Finally, cleavage of the C–O bond in **D** gives a radical intermediate **E**, next two competitive reactions may occur for **E**, which subsequently either obtaining proton from intermediate **A** to furnish the formation of ligand  $L^2$ , or undergoing dimerization to give  $L^3$ . Because of the free rotation of C-C single bond and the steric hindrance from its four connecting groups, ligand  $L^3$  shows two conformations of *cis*-/*trans*-form in formed compounds referring to C-C single bond such as complexes **3** and **5** (*cis*-form, dynamic stability) and **4** and **6** (*trans*-form, thermodynamic stability). Moreover, by increasing reaction temperature or prolonging reaction time, complexes **3** and **5** may be irreversibly transformed into **4** and **6**.

**Figure S1.**

(a) For 1

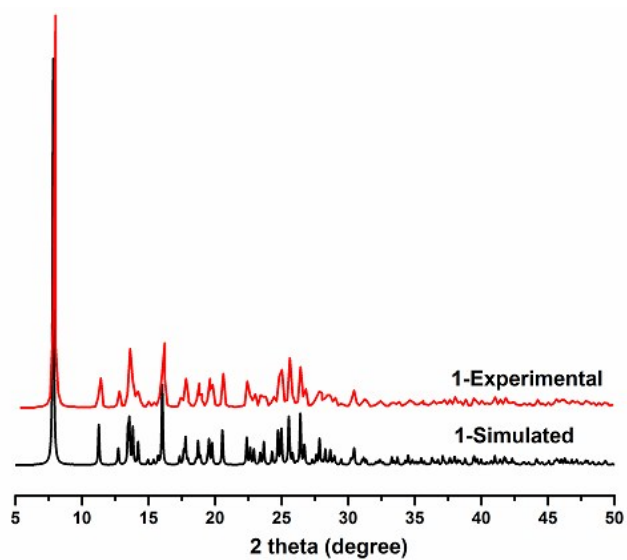

(b) For 2

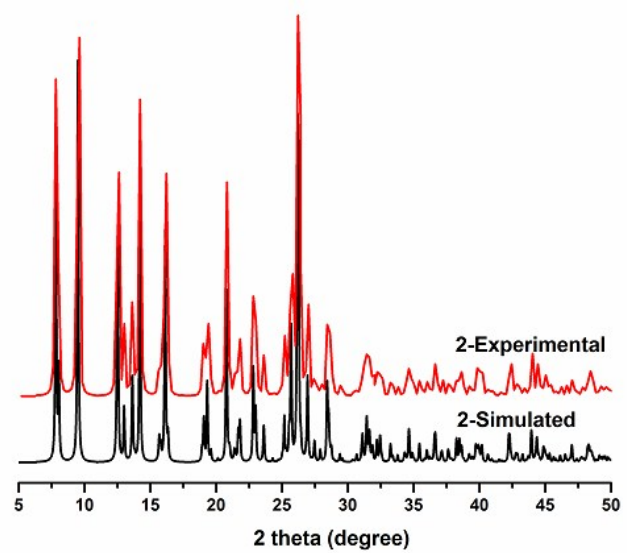

(c) For 3

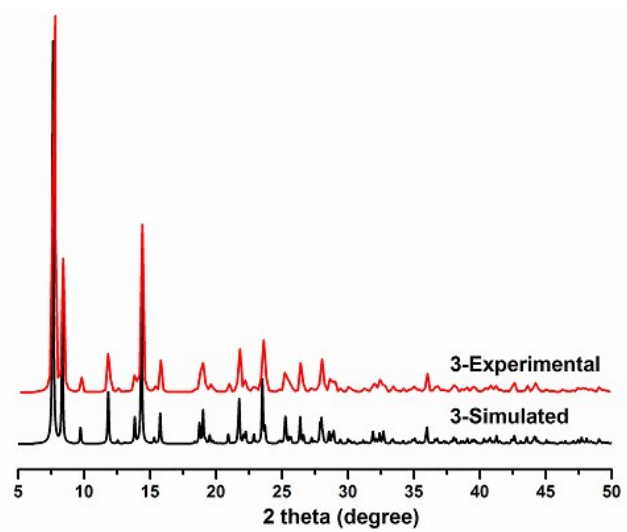

(d) For 4

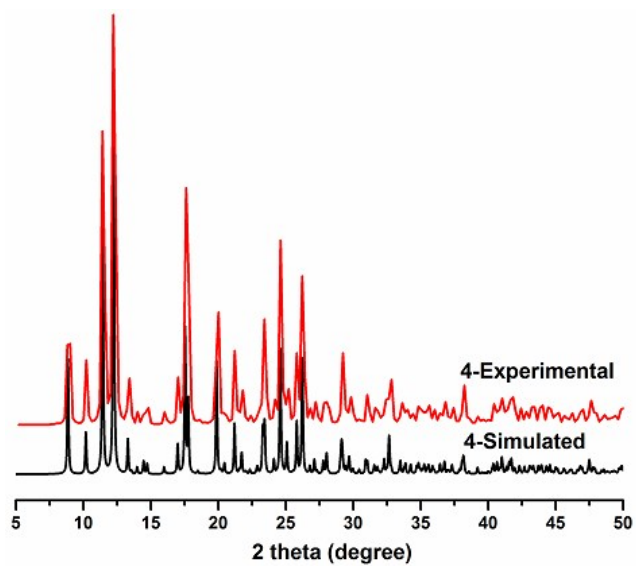

(e) For 5

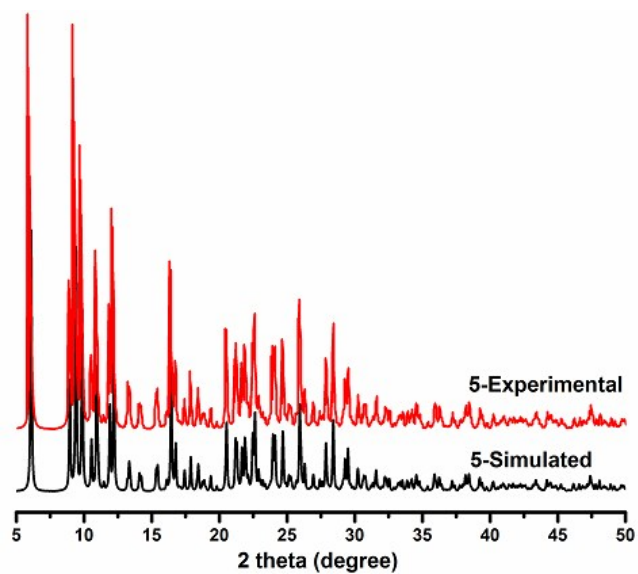

(f) For 6

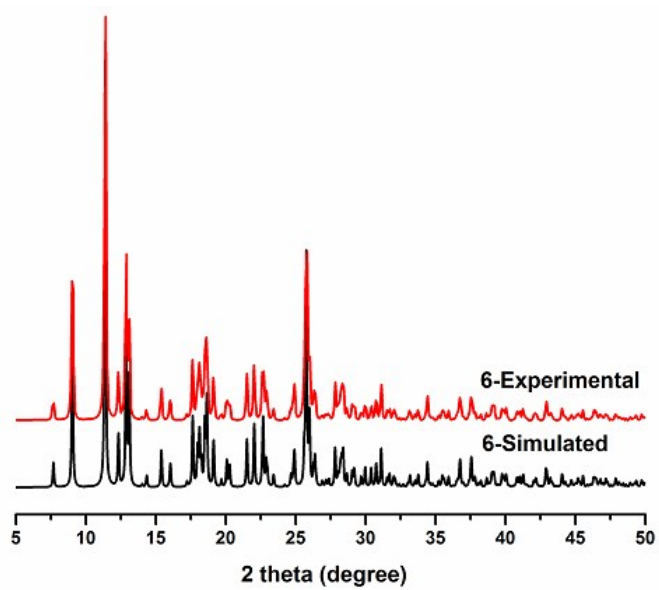

**Figure S2.**

(a) For 1

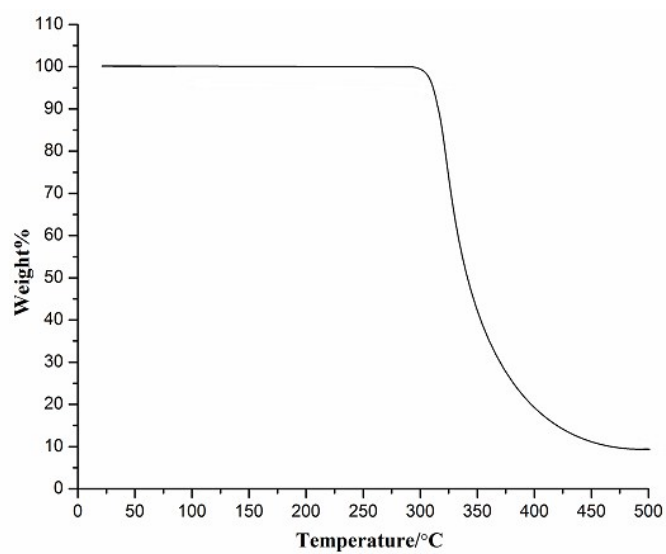

(b) For 2

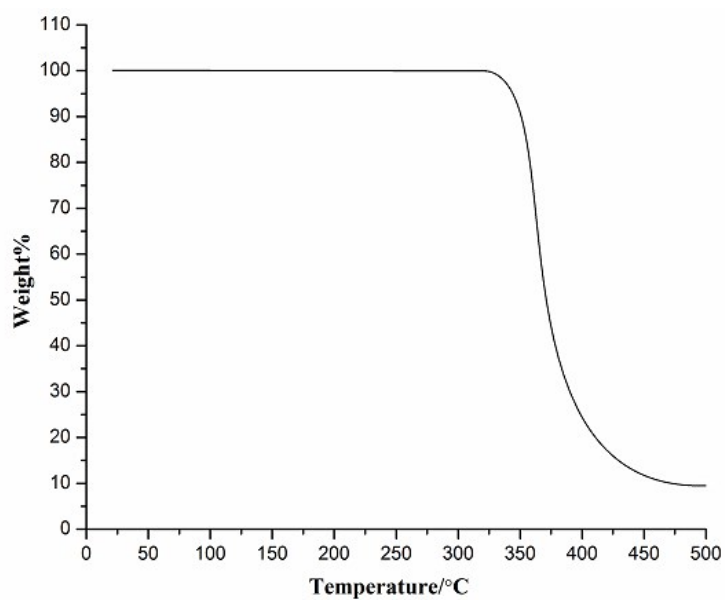

(c) For 3

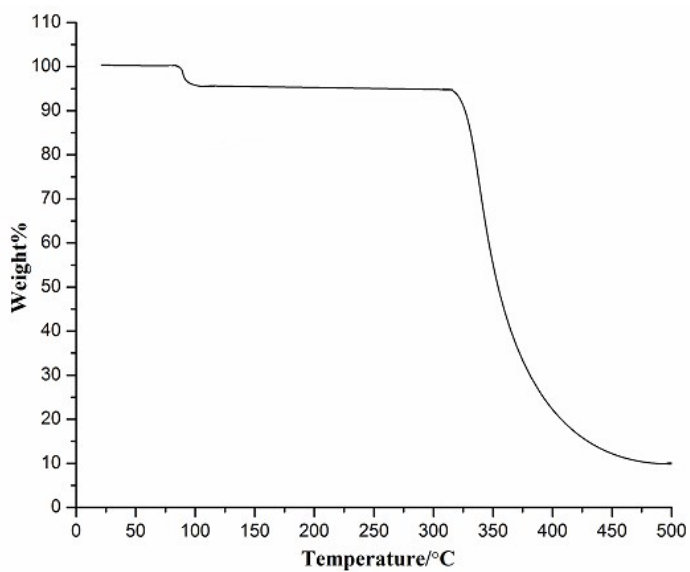

(d) For 4

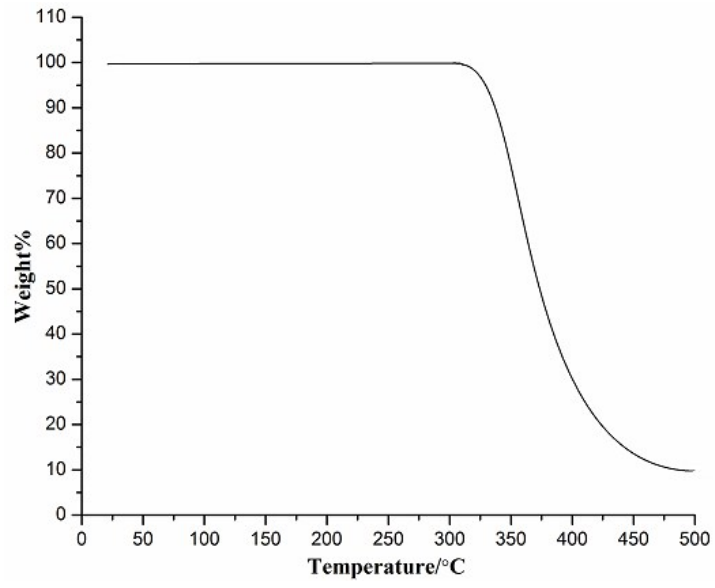

(e) For 5

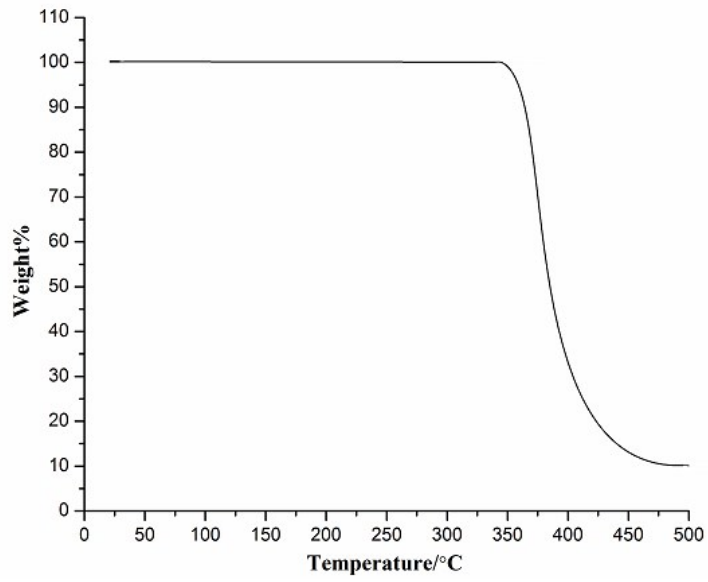

(f) For 6

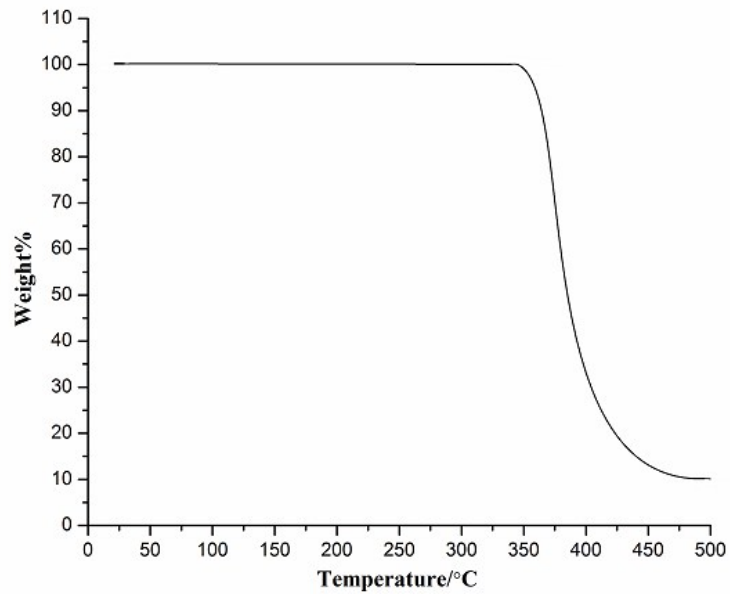

Figure S3.

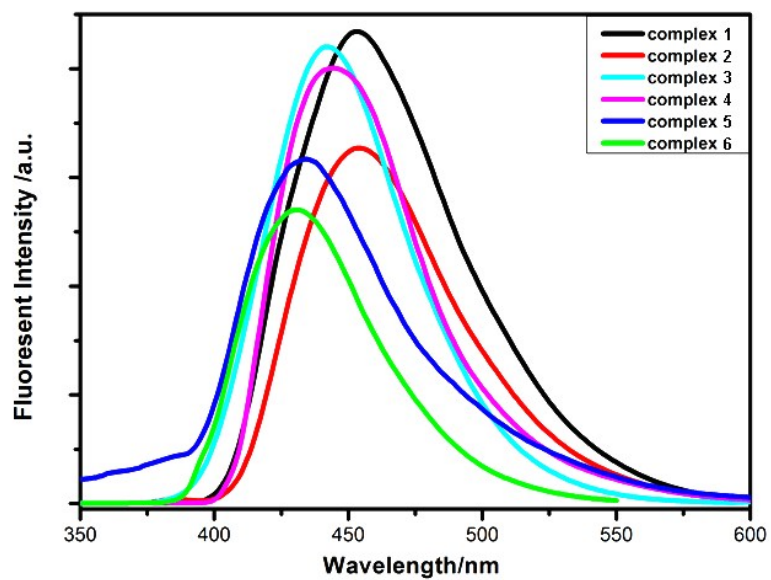

Figure S4.

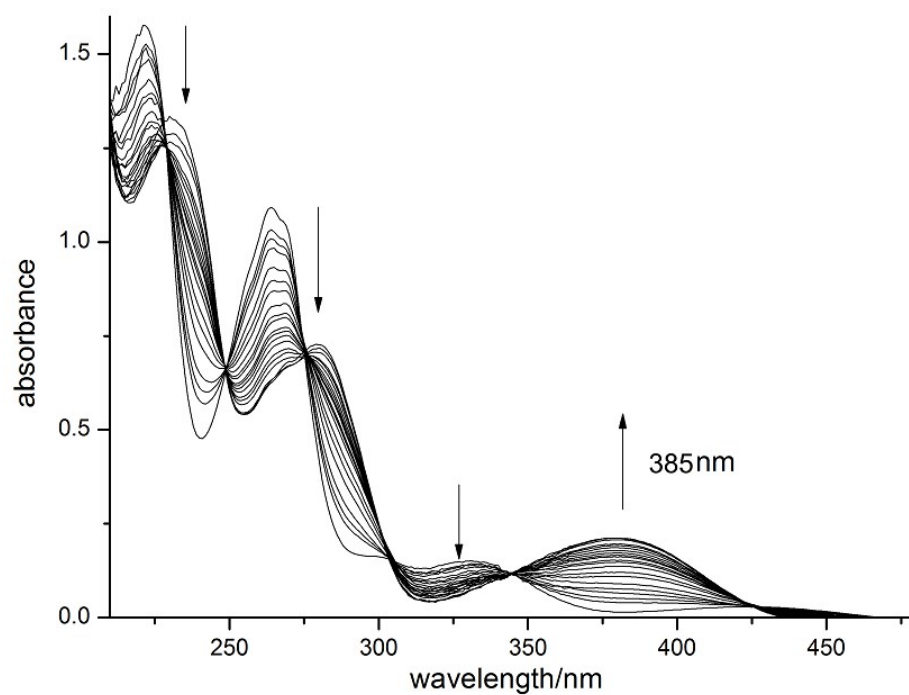

Figure S5.

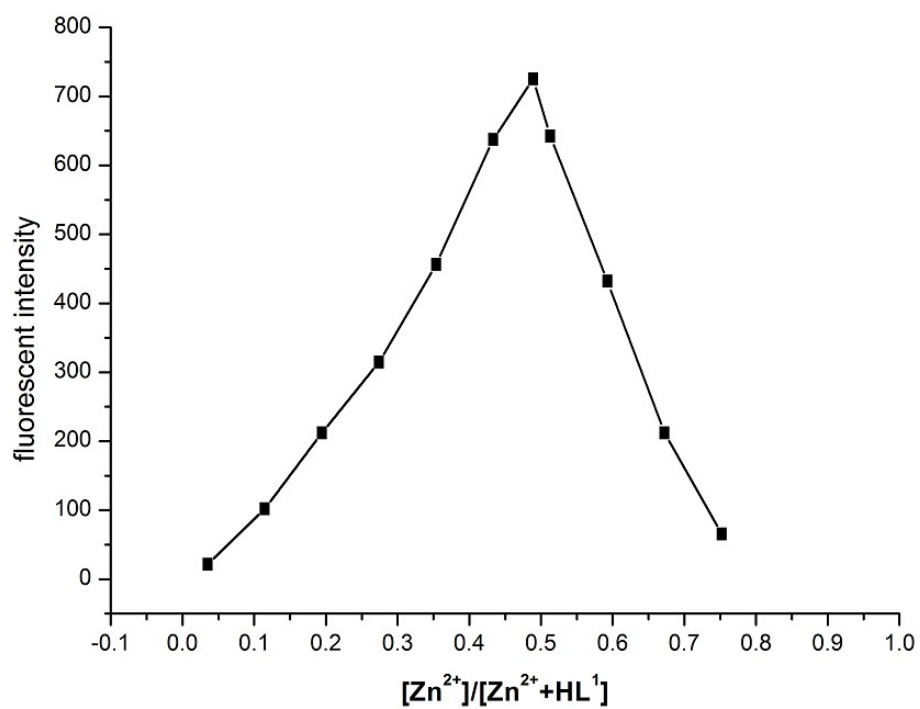

Figure S6

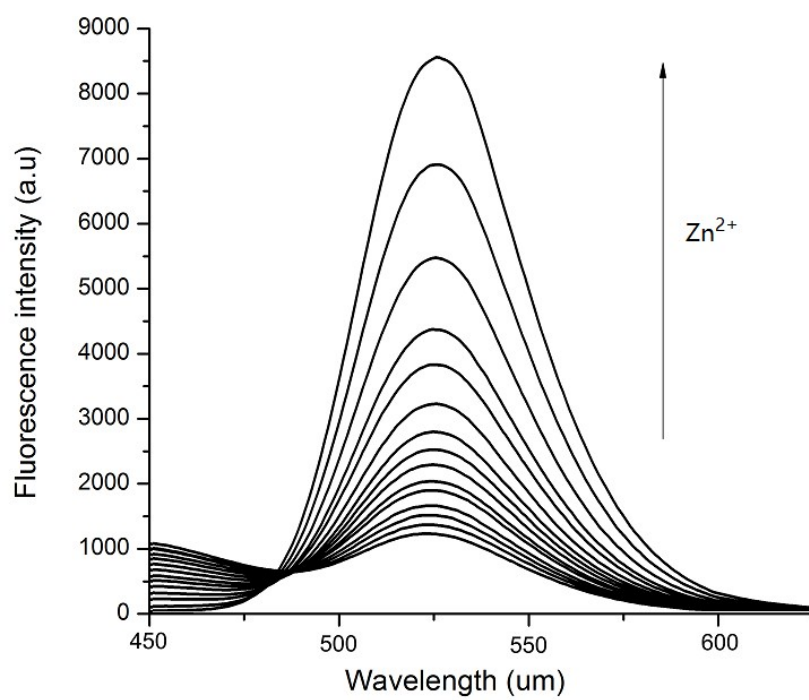

**Figure S7**

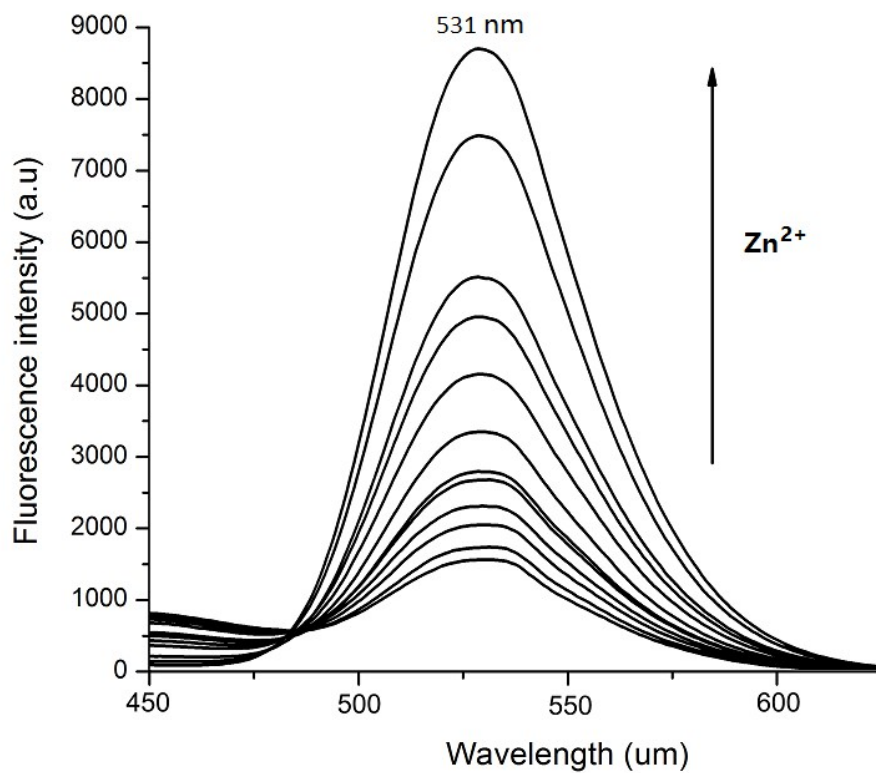

**Figure S8.**

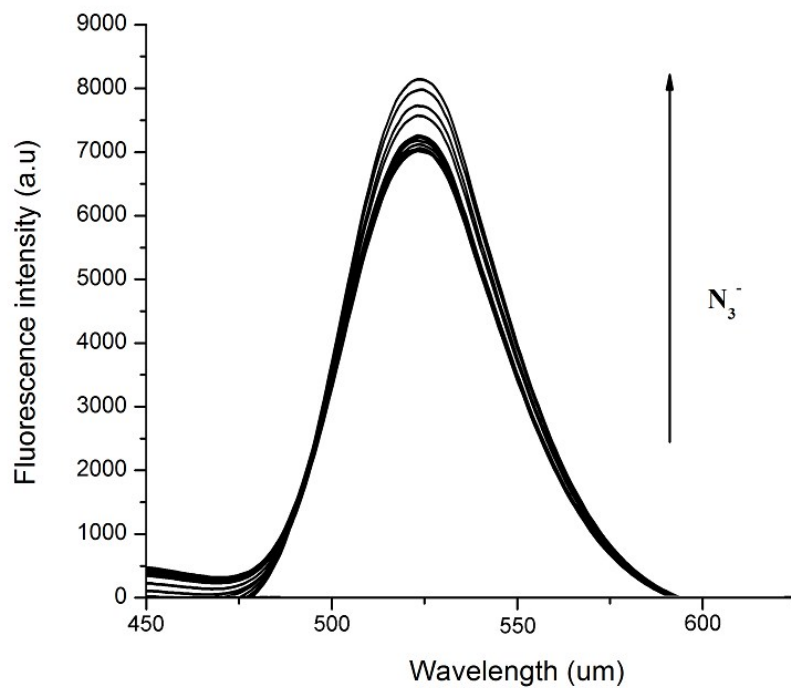



**Figure S9.**

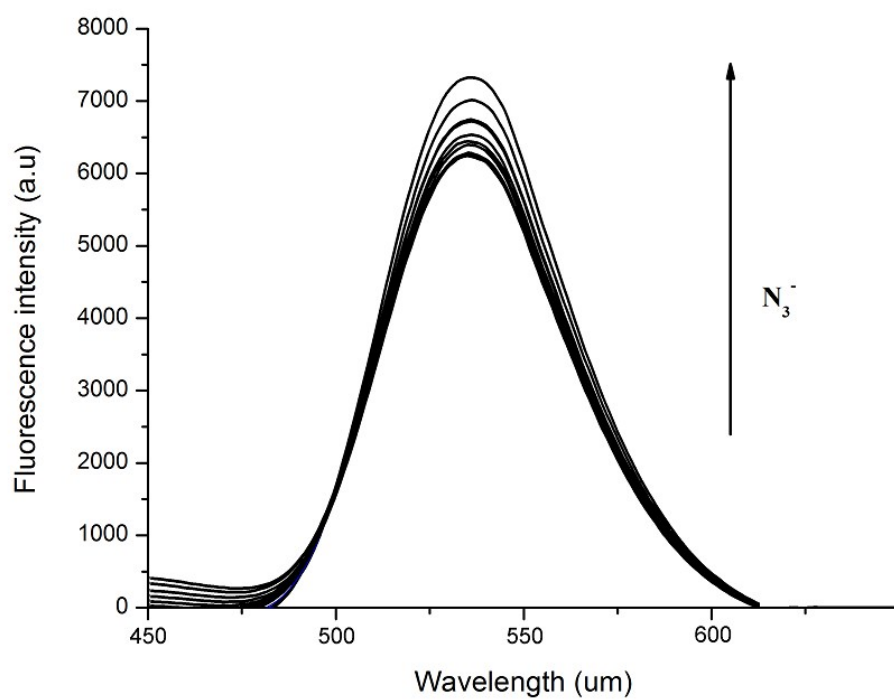

Supplement: c6ra25678c1.pdf [file c6ra25678c1.pdf]
